# Supplementary material for: Experimental Evidence of Intrinsic Disorder and Amyloid Formation by the Henipavirus W Proteins
Source: MDPI journal article supplement (doi:10.3390/ijms23020923), 2022-01-15
Supplement: s1 [file s1]

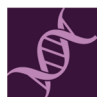

## Supplementary Information

### Experimental evidence of intrinsic disorder and amyloid formation by the Henipavirus W proteins

Giulia Pesce<sup>1</sup>¶, Frank Gondelaud<sup>1</sup>¶, Denis Ptchelkine<sup>1</sup>, Juliet F. Nilsson<sup>1</sup>, Christophe Bignon<sup>1</sup>, Jérémy Cartalas<sup>1</sup>, Patrick Fourquet<sup>2</sup> and Sonia Longhi<sup>1\*</sup>

<sup>1</sup>Lab. Architecture et Fonction des Macromolécules Biologiques (AFMB), UMR 7257, Aix Marseille University and Centre National de la Recherche Scientifique (CNRS), 163 Avenue de Luminy, Case 932, 13288 Mar-seille CEDEX 09, France.

<sup>2</sup>INSERM, Centre de Recherche en Cancérologie de Marseille (CRCM), Centre National de la Recherche Scientifique (CNRS), Marseille Protéomique, Institut Paoli-Calmettes, Aix-Marseille University, 27 Bvd Leï Roure, CS 30059, 13273 Marseille CEDEX 09, France.

¶These authors have equally contributed to the work.

\*to whom correspondence should be sent

Sonia Longhi

AFMB, UMR 7257 CNRS and Aix-Marseille University

163, avenue de Luminy, Case 932, 13288 Marseille Cedex 09, France

Tel: (33) 4 91 82 55 80; Fax: (33) 4 91 26 67 20

E-mail: sonia.longhi@univ-amu.fr

Supplementary Figures S1 to S7

Supplementary Table S1



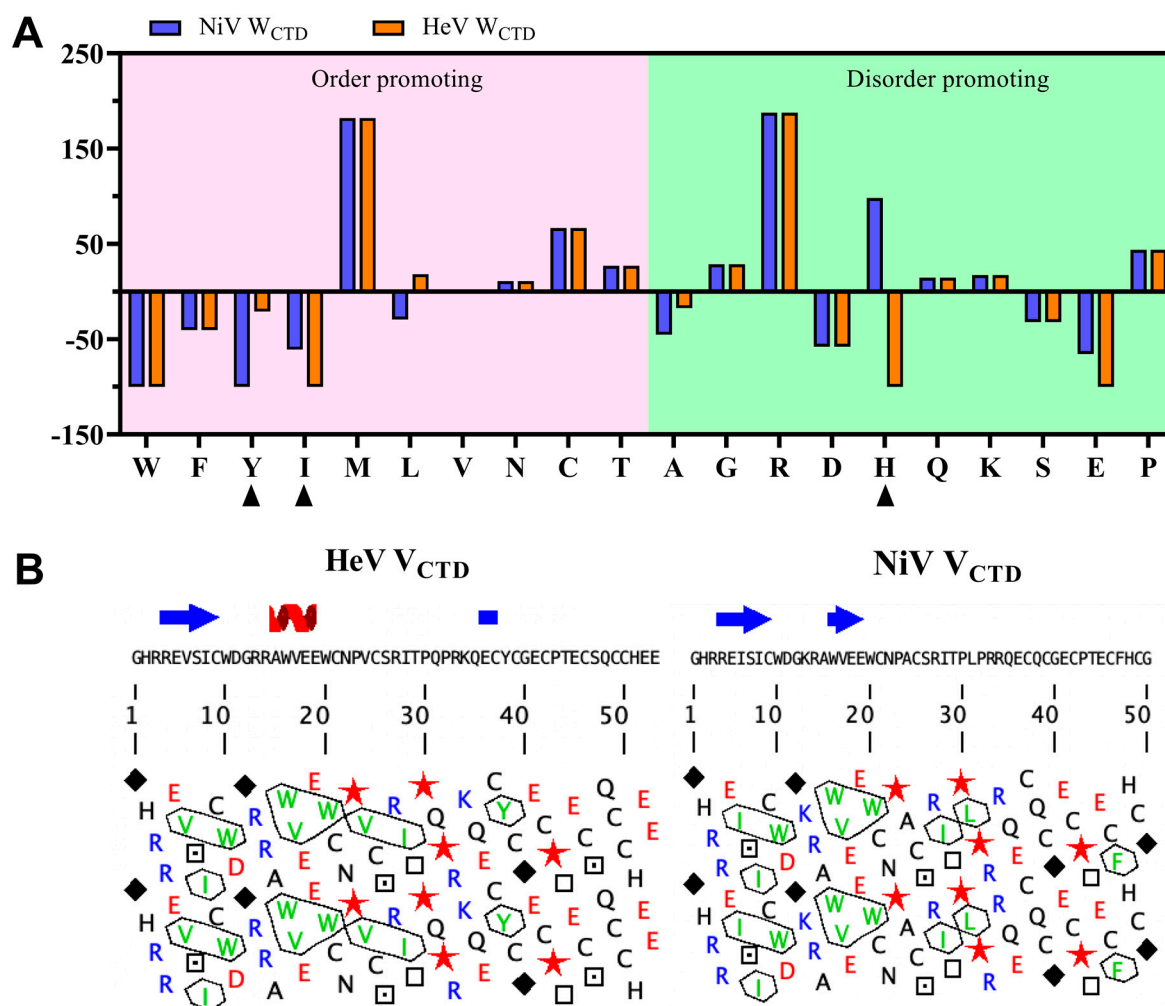

**Figure S3.** (A) Deviation in amino acid composition from the Swiss-PROT database of the HeV and NiV C-terminal domains (CTDs). The relative enrichment in disorder promoting and depletion in order-promoting residues is shown. Residues have been ordered on the x-axis according to the TOP-IDP flexibility index as described in [1]. Arrowheads point residues whose abundance differs most between the two viruses. (B) HCA plots of the CTD of the HeV and NiV V proteins featuring the amino acid sequence above the plot along with secondary structure elements as predicted by the Pred2ary program implemented in MeDor [2].

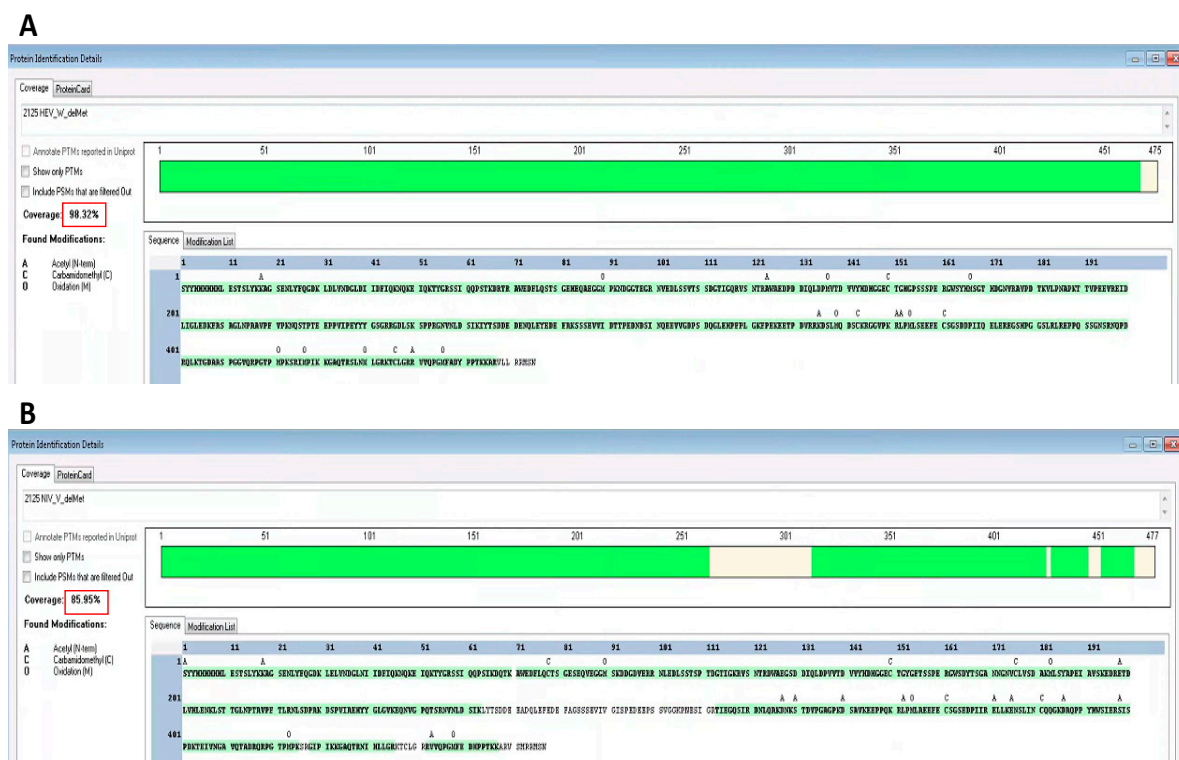

**Figure S4.** Results of Peptide Mass Fingerprint (PMF) of HeV (A) and NiV (B) W proteins. Peptides obtained by tryptic enzymatic digestion are shown in green. The sequence coverage is ~98% for HeV W and ~86% for NiV W (red frame).

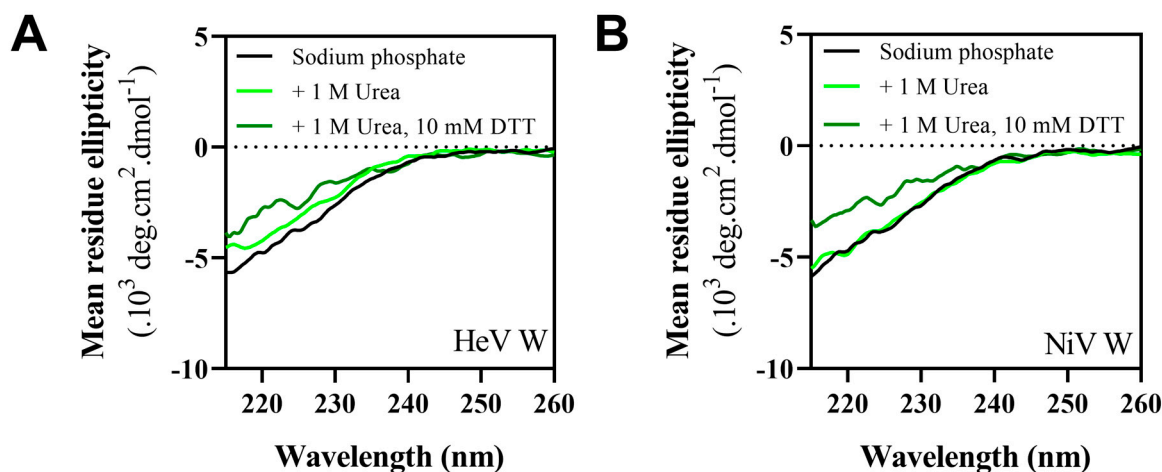

**Figure S5.** Far-UV CD spectra of HeV (A) and NiV (B) W either in 10 mM sodium phosphate at pH 7 or in buffer supplemented with 1 M urea or 1 M urea, 10 mM DTT. The proteins were at 1  $\mu\text{M}$ . Spectra were recorded at 20°C. Data are shown to the point up to which the dyna voltage was in the permissible range.

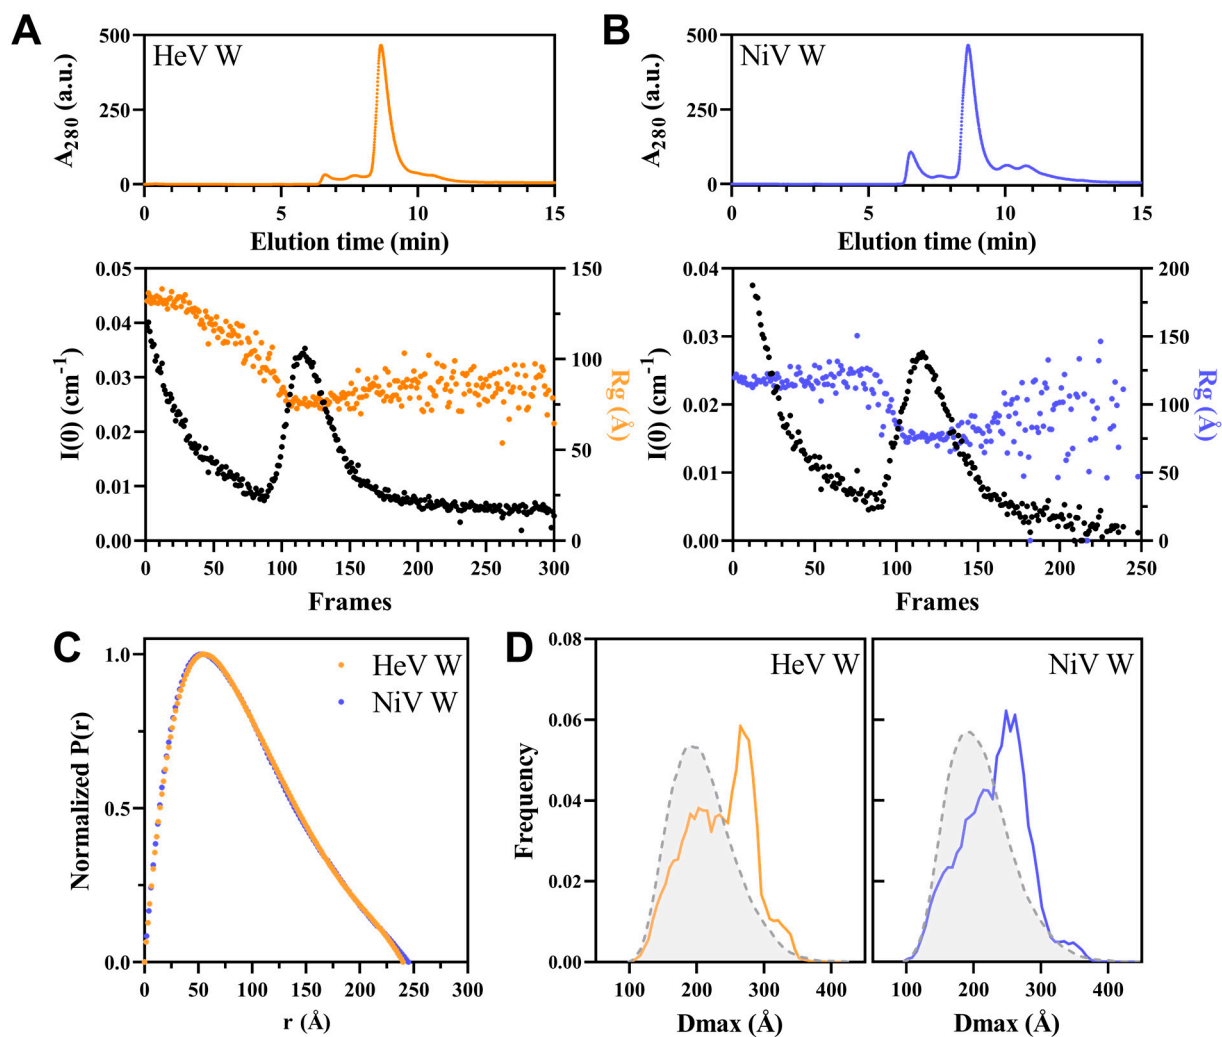

**Figure S6.** (A, B) SEC profile (top) and scattered intensities (bottom) as a function of acquisitions as obtained in SEC-SAXS experiments of the HeV (A) and NiV (B) W proteins. The estimated  $R_g$  per frame is shown in the bottom panels. (C) Pairwise distance distribution function for the HeV and NiV W proteins. (D)  $D_{max}$  distribution in the initial pool (dashed grey line) and in the final EOM ensemble of HeV (orange line) and NiV (blue line) W.

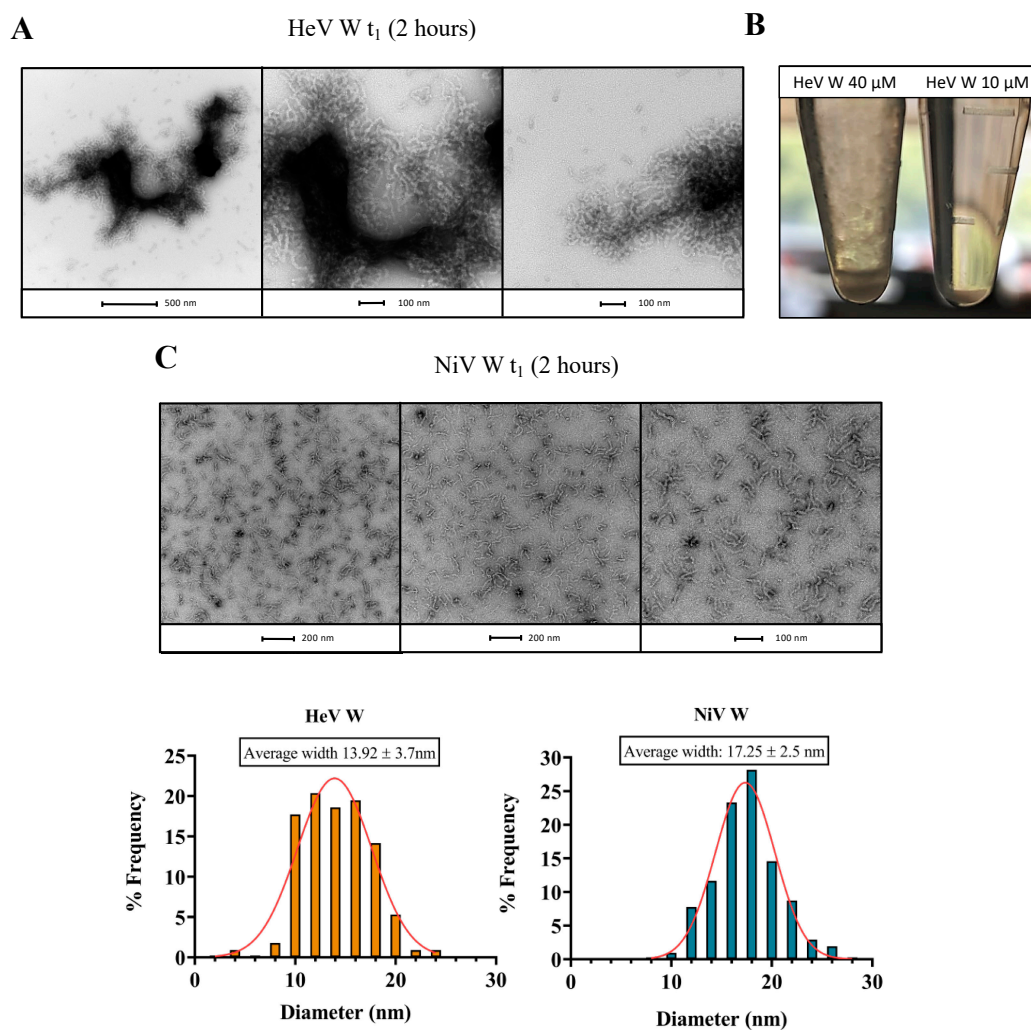

**Figure S7.** (A) Macroscopically visible aggregates of HeV W formed at two different concentrations upon incubation at 37 °C for 10 hours. (B, C) Negative-staining TEM of a HeV (B) or NiV (C) W sample at 40  $\mu$ M at  $t_1$  (2 hours of incubation) showing the presence of large aggregates. Fibrils formed by NiV W are longer compared to  $t_0$  and mono-dispersed on the grid, in contrast to HeV W. (D) Distribution of fibril width of HeV and NiV W protein, of which the Gaussian mean is shown above. The two average values are quite close to each other and consistent with the expected size for amyloid-like fibrils [3]. Each bar in the histogram, centered on  $n$ , corresponds to fibrils whose thickness is comprised between  $n-4$  and  $n+5$ . The analysis was done using the ImageJ software.

**Supplementary Table S1.** List of partners of the HeV and NiV W proteins. All of the reported partners are human, except for the murine inhibitor of nuclear factor kappa-B kinase subunit alpha protein (UniProt Accession number Q60680), whose sequence is very similar to that of its human counterpart (UniProt Accession number O15111).

| W proteins    | Protein partners            |           |                                                               |                       |
|---------------|-----------------------------|-----------|---------------------------------------------------------------|-----------------------|
|               | UniProt KB accession number | Gene name | Protein name                                                  | Reference (Pubmed ID) |
| HeVW (P0C1C6) | P04083                      | ANXA1     | Annexin A1                                                    | 22810585              |
|               | Q13185                      | CBX3      | Chromobox protein homolog 3                                   | 22810585              |
|               | P12277                      | CKB       | Creatine kinase B-type                                        | 22810585              |
|               | P08311                      | CTSG      | Cathepsin G                                                   | 22810585              |
|               | P59665                      | DEFA1     | Neutrophil defensin 1                                         | 22810585              |
|               | P59666                      | DEFA3     | Neutrophil defensin 3                                         | 22810585              |
|               | P12838                      | DEFA4     | Neutrophil defensin 4                                         | 22810585              |
|               | Q9UGM3                      | DMBT1     | Deleted in malignant brain tumors 1 protein                   | 22810585              |
|               | P08246                      | ELANE     | Neutrophil elastase                                           | 22810585              |
|               | P04406                      | GAPDH     | Glyceraldehyde-3-phosphate dehydrogenase                      | 22810585              |
|               | P0C0S8                      | H2AC11    | Histone H2A type 1                                            | 22810585              |
|               | Q96KK5                      | H2AC12    | Histone H2A type 1-H                                          | 22810585              |
|               | Q99878                      | H2AC14    | Histone H2A type 1-J                                          | 22810585              |
|               | Q6FI13                      | H2AC18    | Histone H2A type 2-A                                          | 22810585              |
|               | Q16777                      | H2AC20    | Histone H2A type 2-C                                          | 22810585              |
|               | P04908                      | H2AC4     | Histone H2A type 1-B/E                                        | 22810585              |
|               | Q93077                      | H2AC6     | Histone H2A type 1-C                                          | 22810585              |
|               | P20671                      | H2AC7     | Histone H2A type 1-D                                          | 22810585              |
|               | Q9BTM1                      | H2AJ      | Histone H2A.J                                                 | 22810585              |
|               | Q7L7L0                      | H2AW      | Histone H2A type 3                                            | 22810585              |
|               | O60814                      | H2BC12    | Histone H2B type 1-K                                          | 22810585              |
|               | Q99880                      | H2BC13    | Histone H2B type 1-L                                          | 22810585              |
|               | Q99879                      | H2BC14    | Histone H2B type 1-M                                          | 22810585              |
|               | Q99877                      | H2BC15    | Histone H2B type 1-N                                          | 22810585              |
|               | Q5QNW6                      | H2BC18    | Histone H2B type 2-F                                          | 22810585              |
|               | P62807                      | H2BC4     | Histone H2B type 1-C/E/F/G/I                                  | 22810585              |
|               | P58876                      | H2BC5     | Histone H2B type 1-D                                          | 22810585              |
|               | Q93079                      | H2BC9     | Histone H2B type 1-H                                          | 22810585              |
|               | P62805                      | H4C1      | Histone H4                                                    | 22810585              |
|               | P01876                      | IGHA1     | Immunoglobulin heavy constant alpha 1                         | 22810585              |
|               | P01857                      | IGHG1     | Immunoglobulin heavy constant gamma 1                         | 22810585              |
|               | P01859                      | IGHG2     | Immunoglobulin heavy constant gamma 2                         | 22810585              |
|               | P01834                      | IGKC      | Immunoglobulin kappa constant                                 | 22810585              |
|               | P0CG04                      | IGLC1     | Immunoglobulin lambda constant 1                              | 22810585              |
|               | P0DOY2                      | IGLC2     | Immunoglobulin lambda constant 2                              | 22810585              |
|               | P0DOY3                      | IGLC3     | Immunoglobulin lambda constant 3                              | 22810585              |
|               | P0CF74                      | IGLC6     | Immunoglobulin lambda constant 6                              | 22810585              |
|               | O00505                      | KPNA3     | Importin subunit alpha-4                                      | 22810585              |
|               | O00629                      | KPNA4     | Importin subunit alpha-3                                      | 22810585              |
|               | Q14974                      | KPNB1     | Importin subunit beta-1                                       | 22810585              |
|               | P02788                      | LTF       | Lactotransferrin                                              | 22810585              |
|               | P61626                      | LYZ       | Lysozyme C                                                    | 22810585              |
|               | P05164                      | MPO       | Myeloperoxidase                                               | 22810585              |
|               | P07737                      | PFN1      | Profilin-1                                                    | 22810585              |
|               | P12273                      | PIP       | Prolactin-inducible protein                                   | 22810585              |
|               | P24158                      | PRTN3     | Myeloblastin                                                  | 22810585              |
|               | P42224                      | STAT1     | Signal transducer and activator of transcription 1-alpha/beta | 22810585              |
|               | P52630                      | STAT2     | Signal transducer and activator of transcription 2            | 22810585              |
|               | P31946                      | YWHAB     | 14-3-3 protein beta/alpha                                     | 22810585              |
|               | P62258                      | YWHAE     | 14-3-3 protein epsilon                                        | 22810585              |
|               | P61981                      | YWHAG     | 14-3-3 protein gamma                                          | 22810585              |
|               | P27348                      | YWHAQ     | 14-3-3 protein theta                                          | 22810585              |
|               | P63104                      | YWHAZ     | 14-3-3 protein zeta/delta                                     | 22810585              |

| W proteins    | Protein partners            |           |                                                               |                       |
|---------------|-----------------------------|-----------|---------------------------------------------------------------|-----------------------|
|               | UniProt KB accession number | Gene name | Protein name                                                  | Reference (Pubmed ID) |
| NiVW (P0C1C7) | O75934                      | BCAS2     | Pre-mRNA-splicing factor SPF27                                | 28904190              |
|               | Q99459                      | CDC5L     | Cell division cycle 5-like protein                            | 28904190              |
|               | Q60680                      | Chuk      | Inhibitor of nuclear factor kappa-B kinase subunit alpha      | 24269682              |
|               | P12277                      | CKB       | Creatine kinase B-type                                        | 22810585              |
|               | Q02539                      | H1-1      | Histone H1.1                                                  | 22810585              |
|               | P22492                      | H1-6      | Histone H1t                                                   | 22810585              |
|               | P0C0S8                      | H2AC11    | Histone H2A type 1                                            | 22810585              |
|               | Q96KK5                      | H2AC12    | Histone H2A type 1-H                                          | 22810585              |
|               | Q99878                      | H2AC14    | Histone H2A type 1-J                                          | 22810585              |
|               | Q6FI13                      | H2AC18    | Histone H2A type 2-A                                          | 22810585              |
|               | Q16777                      | H2AC20    | Histone H2A type 2-C                                          | 22810585              |
|               | P04908                      | H2AC4     | Histone H2A type 1-B/E                                        | 22810585              |
|               | Q93077                      | H2AC6     | Histone H2A type 1-C                                          | 22810585              |
|               | P20671                      | H2AC7     | Histone H2A type 1-D                                          | 22810585              |
|               | Q9BTM1                      | H2AJ      | Histone H2A.J                                                 | 22810585              |
|               | Q7L7L0                      | H2AW      | Histone H2A type 3                                            | 22810585              |
|               | P62805                      | H4C1      | Histone H4                                                    | 22810585              |
|               | P22626                      | HNRNPA2B1 | Heterogeneous nuclear ribonucleoproteins A2/B1                | 22810585              |
|               | P31942                      | HNRNPH3   | Heterogeneous nuclear ribonucleoprotein H3                    | 22810585              |
|               | P11021                      | HSPA5     | Endoplasmic reticulum chaperone BiP                           | 22810585              |
|               | O00505                      | KPNA3     | Importin subunit alpha-4                                      | 28904190              |
|               | O00629                      | KPNA4     | Importin subunit alpha-3                                      | 28904190              |
|               | Q14974                      | KPNB1     | Importin subunit beta-1                                       | 22810585              |
|               | P12036                      | NEFH      | Neurofilament heavy polypeptide                               | 22810585              |
|               | Q6T4R5                      | NHS       | Nance-Horan syndrome protein                                  | 22810585              |
|               | O43660                      | PLRG1     | Pleiotropic regulator 1                                       | 28904190              |
|               | Q9UMS4                      | PRPF19    | Pre-mRNA-processing factor 19                                 | 28904190              |
|               | P31947                      | SFN       | 14-3-3 protein sigma                                          | 32321809              |
|               | P42224                      | STAT1     | Signal transducer and activator of transcription 1-alpha/beta | 28904190              |
|               | P52630                      | STAT2     | Signal transducer and activator of transcription 2            | 22810585              |
|               | Q14765                      | STAT4     | Signal transducer and activator of transcription 4            | 28904190              |
|               | P31946                      | YWHAB     | 14-3-3 protein beta/alpha                                     | 22810585              |
|               | P62258                      | YWHAE     | 14-3-3 protein epsilon                                        | 22810585              |
|               | P61981                      | YWHAG     | 14-3-3 protein gamma                                          | 22810585              |
|               | Q04917                      | YWHAH     | 14-3-3 protein eta                                            | 32321809              |
|               | P27348                      | YWHAQ     | 14-3-3 protein theta                                          | 22810585              |
|               | P63104                      | YWHAZ     | 14-3-3 protein zeta/delta                                     | 22810585              |

## References

1. Campen, A.; Williams, R.M.; Brown, C.J.; Meng, J.; Uversky, V.N.; Dunker, A.K. TOP-IDP-scale: a new amino acid scale measuring propensity for intrinsic disorder. *Protein Pept Lett* **2008**, *15*, 956–963, doi:10.2174/092986608785849164.
2. Lieutaud, P.; Canard, B.; Longhi, S. MeDor: a metaserver for predicting protein disorder. *BMC Genomics* **2008**, *9*, S25.
3. Boyer, D.R.; Mynhier, N.A.; Saway, M.R. Why amyloid fibrils have a limited width. *BioRxiv* **2021**, doi:10.1101/2021.07.02.450971.
